# Supplementary material
Source: PubMed Central journal article supplement (PMC4576676)
Supplement: supp_115.063677_SupplFig1_63677.pdf [file supp_115.063677_SupplFig1_63677.pdf]

# “Aryl Hydrocarbon Receptor Activity of Tryptophan Metabolites in Young Adult Mouse Colonocytes”

Y. Chen, U.H. Jin, C.D. Allred, A. Jayraman, R.S.Chapkin and S. Safe  
*Drug Metabolism and Disposition*

## Supplemental Figure 1

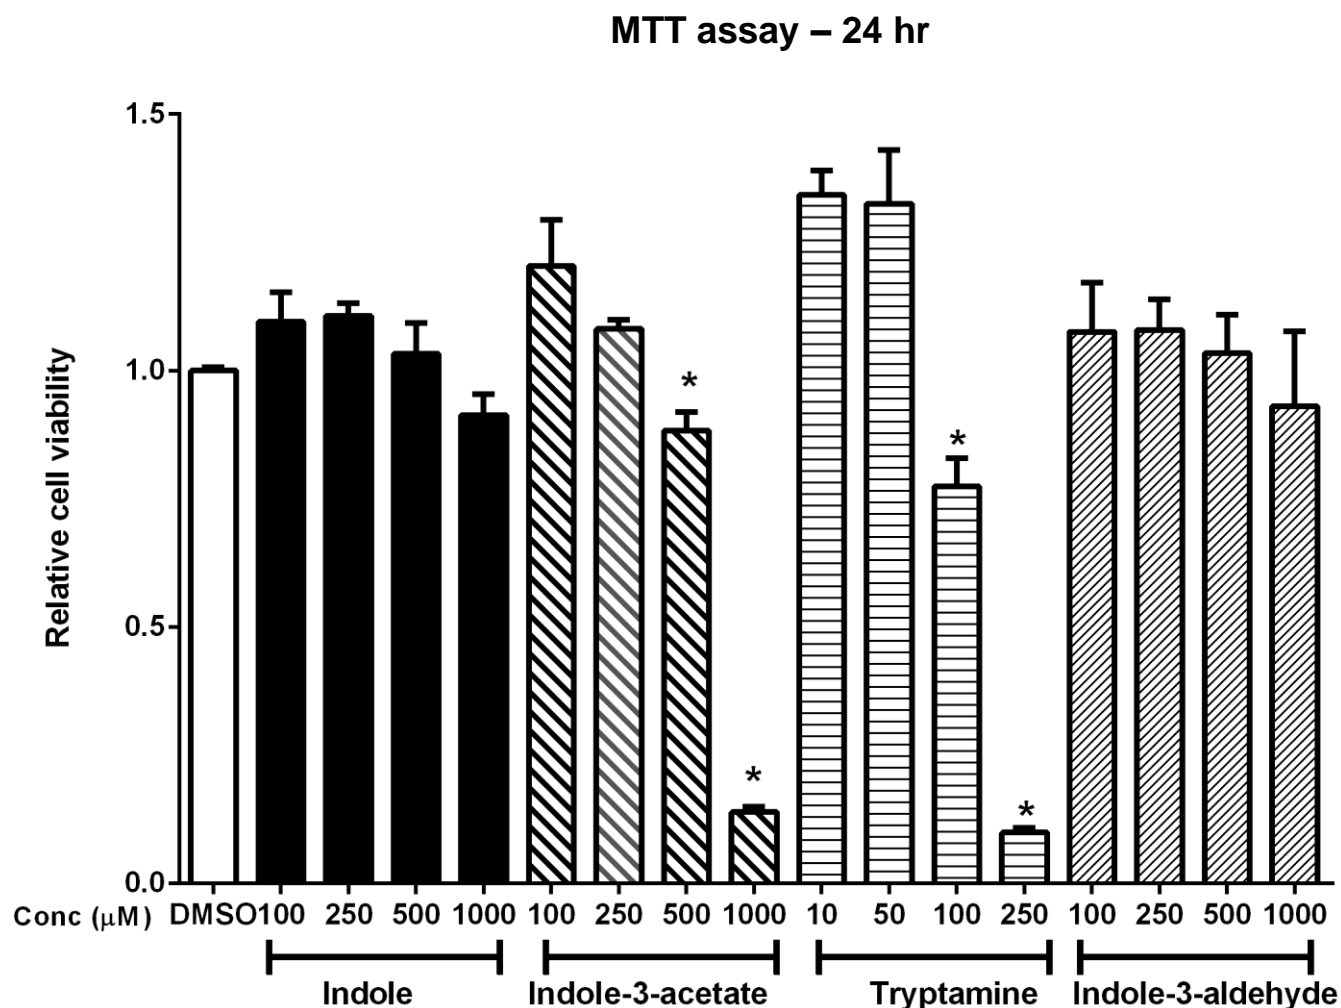

**Supplemental Figure 1.** Cells were treated with different concentrations of the tryptophan metabolites for 24 hr and assayed for metabolic activity using the MTT assay. Significantly ( $p < 0.05$ ) decreased activity is indicated (\*).
